# Supplementary material for: Patterns in Physician Burnout in a Stable-Linked Cohort
Source: PubMed Central journal article supplement (PMC10559175; doi:10.1001/jamanetworkopen.2023.36745), 2023-10-06
Supplement: jamanetwopen-e2336745-s001.pdf [file jamanetwopen-e2336745-s001.pdf]

## Data Sharing Statement

Ortega. Patterns in Physician Burnout in a Stable-Linked Cohort. *JAMA Netw Open*. Published October 06, 2023. doi:10.1001/jamanetworkopen.2023.36745

### Data

**Data available:** No
